1 ***Admp* regulates tail bending by controlling ventral epidermal cell polarity via**  
2 **phosphorylated myosin localization**

3

4 Yuki S. Kogure <sup>1</sup>, Hiromochi Muraoka <sup>1</sup>, Wataru C. Koizumi <sup>1</sup>, Raphaël Gelin-alessi <sup>1</sup>,  
5 Benoit Godard <sup>2</sup>, Kotaro Oka <sup>1,3,4</sup>, C. P. Heisenberg <sup>2\*</sup> and Kohji Hotta <sup>1\*</sup>

6

7 **Affiliations**

8 <sup>1</sup> Department of Biosciences and Informatics, Faculty of Science and Technology, Keio  
9 University, Kouhoku-ku, Yokohama 223-8522, Japan

10 <sup>2</sup> Institute of Science and Technology Austria, Klosterneuburg, Austria

11 <sup>3</sup> Waseda Research Institute for Science and Engineering, Waseda University, 2-2  
12 Wakamatsucho, Shinjuku, Tokyo 162-8480, Japan

13 <sup>4</sup> Graduate Institute of Medicine, College of Medicine, Kaohsiung Medical University,  
14 Kaohsiung City 80708, Taiwan

15 \* **Correspondence:** Kohji Hotta, [khotta@bio.keio.ac.jp](mailto:khotta@bio.keio.ac.jp) and C. P. Heisenberg,  
16 [heisenberg@ist.ac.at](mailto:heisenberg@ist.ac.at)

17 **Running Title** (32/32): Polarity by *Admp* regulated tail bending

18 **Summary Statement** (26/30 words): *Admp* is an upstream regulator of tail bending in  
19 the chordate *Ciona* tailbud embryo, determining tissue polarity of the ventral midline  
20 epidermis by localizing phosphorylated myosin.

21 **Keywords (3-6):** tunicate, tail bending, intercalation, polarity, boat cell, embryo shape

22

23 **Abstract (179/180 words):**

24 The transient but pronounced ventral tail bending is found in many chordate  
25 embryos and constitutes an interesting model of how tissue interactions control embryo  
26 shape (Lu et al., 2020). Here, we identify one key upstream regulator of ventral tail  
27 bending in the ascidian *Ciona* embryo. We show that during early tailbud stage, ventral  
28 epidermal cells exhibit a boat-shaped morphology (boat cell) with a narrow apical  
29 surface where phosphorylated myosin (pMLC) accumulated. We further show that  
30 interfering with the function of the BMP ligand *Admp* leads to pMLC localizing to the  
31 basal instead of the apical side of ventral epidermal cells and a reduced number of boat

32 cells. Finally, we show that cutting ventral epidermal midline cells at their apex using a  
33 ultraviolet laser relaxes ventral tail bending. Based on these results, we propose a novel  
34 function for Admp in localizing pMLC to the apical side of ventral epidermal cells,  
35 which causes the tail to bend ventrally by resisting antero-posterior notochord extension  
36 at the ventral side of the tail.

37

38

39 **(main text approx. 6790/7000 words)**

## 40 **Introduction**

41 Although chordates display diverse shapes and sizes in the adult stage, they  
42 have similar shapes during their organogenesis period, called the phylotypic stage  
43 (Sander, 1983). During the phylotypic stage, chordates pass through neurulation and  
44 subsequently reach the tailbud stage. At the chordate tailbud stage, the embryo tail  
45 elongates along the anterior-posterior (AP) axis, and most tailbud embryos become  
46 curved with their tail bending ventrally (Richardson et al., 1997).

47 The ascidian tunicate *Ciona intestinalis* type A (*Ciona robusta*) embryo also  
48 shows a curved body shape with its tail bending ventrally (ventroflexion) during the  
49 early- to mid- tailbud stages [stage (st.) 19 to st. 22], after which bending relaxes  
50 again, and eventually the tail bends dorsally (dorsiflexion). This dynamic body  
51 shape change occur even if the egg envelope is removed, suggesting that *Ciona* tail  
52 bending can occur in the absence of external spatial confinement (Hotta et al., 2007;  
53 Lu et al., 2020).

54 During tail extension, notochord cells change their shape by circumferential  
55 contraction during st. 21 to 24 (Lu et al., 2019; Mizotani et al., 2018; Sehring et al.,  
56 2014). This circumferential contraction, when applied on a compression-resisting  
57 system, such as the notochord, is converted into a pushing force along the AP axis of  
58 the notochord, thereby elongating the notochord (Lu et al., 2019; Miyamoto and  
59 Crowther, 1985).

60 Although it has been shown that an AP pushing force is exerted by each  
61 notochord cell (Sehring et al., 2014; Zhou et al., 2015), and that tail elongation is  
62 achieved by the notochord actively producing AP elongating forces (Miyamoto and

63 Crowther, 1985; Sehring et al., 2014; Spemann, 1987; Ubisch, 1939), the mechanism  
64 by which the tail bends in the tailbud stage embryo is only incompletely understood.  
65 Recently, Lu et al. (2020) have shown that tail bending in *Ciona* during the early  
66 tailbud stages (st. 18 to st. 20) is caused by the actomyosin cytoskeleton displaying  
67 different contraction forces at the ventral compared to the dorsal side of the  
68 notochord. However, the upstream regulators involved in *Ciona* tail bending, and the  
69 morphogenetic mechanisms driving tail bending after st. 20 remain unclear.

70 In this study, we used a combination of genetic, cell biological and  
71 biophysical/ three-dimensional (3D) imaging experiments to show that *Admp*  
72 regulates cell polarity by determining the localization of phosphorylated myosin  
73 (pMLC) at the apex of ventral midline epidermal cells. This ventral epidermal  
74 myosin accumulation leads to ventral tail bending by resisting notochord-driven AP  
75 tail elongation specifically at the ventral side during mid-tailbud stages.

76

## 77 **Results**

### 78 ***Admp* is required for ventral but not dorsal tail bending**

79 Previous studies about *Admp* function weren't focused on tail bending but the  
80 phenotype is apparent in their images. The knock-down of *Admp* has been shown to  
81 cause reduced ventral tail bending in mid-tailbud stage *Ciona* embryos (Imai, 2006;  
82 Imai et al., 2012; Pasini et al., 2006). As these studies did not focus on the tail  
83 bending morphant phenotype, we decided to mechanistically dissect how *Admp*  
84 function in ventral tail bending.

85 To confirm that *Admp* indeed is required for *Ciona* ventral tail bending, we  
86 first performed microinjection of *Admp* morpholinos (MO) and observed the  
87 morphant phenotype by recording time-lapse movies (Fig. 1A, Suppl. Mov. 1). We  
88 found that ventral tail bending (ventroflexion; Fig. 1A, red arrow) was not occurring  
89 in *Admp* morphant embryos at the mid-tailbud stages; in contrast, dorsal tail bending  
90 (dorsiflexion; Fig. 1A, yellow arrows) was unaffected in morphant embryos.

91 Comparing the bending angle of *Admp* morphant with wild type (WT) embryos at st.

92 18 to 22, when WT ventroflexion occurs (Fig. 1B), showed that the degree of  
93 ventroflexion was significantly reduced in morphant embryos (Fig. 1C; N = 11/11).  
94 Likewise, embryos treated with dorsomorphin, an Admp/BMP signaling inhibitor,  
95 also displayed a significantly reduced ventral tail bending angle (Fig. 1D; N = 5–12,  
96 Suppl. Fig. 1A and 1B). Together, these experiments indicate that Admp/BMP  
97 signaling regulates the ventroflexion of ascidian tailbud embryos.

98 Admp is a BMP ligand, which in *Ciona*, has been reported to induce the  
99 differentiation of ventral peripheral neurons (Imai et al., 2012; Waki et al., 2015),  
100 with the homeobox gene *Msxb* functioning as a downstream effector of Admp  
101 signaling in this process (Imai et al., 2012). We thus investigated whether *Msxb*  
102 might also function as a downstream effector of Admp signaling in *Ciona*  
103 ventroflexion. However, ventroflexion appeared normal in *Msxb* morphant embryos  
104 (Suppl. Fig. 1C), suggesting that *Msxb*, unlike the situation in neuronal  
105 differentiation, does not function as a downstream effector of Admp signaling in  
106 ventroflexion (Roure and Darras, 2016; Waki et al., 2015).

107

### 108 **Smad phosphorylation in ventral midline epidermal cells**

109 In *Ciona*, *Admp* is expressed in the endoderm and lateral epidermis (Imai et  
110 al., 2012). In vertebrates, *Admp* is expressed first dorsally within the embryo, and  
111 then moves to the opposite side to specify the ventral fate, but it is difficult to predict  
112 the place of Admp activity from its gene expression pattern. Moreover, *Admp*  
113 promotes *bmp4* expression and controls the positioning of *bmp4* expression during  
114 regeneration of left-right asymmetric fragments in planarian (Gaviño and Reddien,  
115 2011).

116 In *Ciona*, *Admp* expression appears normal in *Bmp2/4* morphants, but  
117 *Bmp2/4* expression is suppressed in *Admp* morphants (Imai et al., 2012).  
118 Furthermore, the BMP target Smad is phosphorylated by Admp signaling, followed  
119 by translocation of phosphorylated Smad into the nucleus and activation of target  
120 genes (Blitz and Cho, 2009; De Robertis, 2009; Imai et al., 2012). In line with this,

121 Smad phosphorylation and activation in ventral epidermal cells is reduced in *Ciona*  
122 *Admp* morphant at the late gastrula stage (Fig. 1E; Waki et al., 2015).

123 To determine when and where within the tailbud stage *Ciona* embryo *Admp*/BMP  
124 signaling is activated, we performed antibody staining of phosphorylated  
125 pSmad1/5/8 (Fig. 1E). Consistent with a previous studies (Waki et al., 2015), pSmad  
126 staining was observed in ventral midline epidermal cells after the late gastrula stage  
127 (Fig. 1E), whereas no specific signal was detected in other regions, including  
128 notochord, from gastrula to the initial tailbud period. This indicates that *Admp*/BMP  
129 signal is specifically activated in ventral midline epidermal cells.

130 Asymmetric activation of actomyosin contractility in notochord cells has  
131 recently been proposed to be responsible for ventroflexion during st. 18 to st. 20 (Lu  
132 et al., 2020). To test whether *Admp* functions in ventroflexion by affecting  
133 asymmetric actomyosin contraction within notochord cells, we analyzed Actin  
134 localization in *Admp* signaling defective embryos. We found that in both  
135 dorsomorphin-treated and *Admp* morphant embryos, asymmetric actin localization in  
136 notochord cells remained unchanged (Suppl. Fig. 2). This indicates that *Admp*/BMP  
137 signaling affects ventroflexion independently from the proposed function of  
138 asymmetric actomyosin contraction in notochord cells.

139

#### 140 ***Admp* is required for ordered cell-cell intercalation of ventral epidermal cells**

141 Next, we investigated the dynamics of dorsal and ventral epidermal cell  
142 rearrangements during ventral tail bending from st. 18 to 24 (Suppl. Fig. 3). Cell-cell  
143 intercalation of ventral epidermal cells started at st. 19 and was completed by st. 24.  
144 The tail epidermis of the ascidian embryo is finally elongated along the AP axis by  
145 arranging epidermal cells in a row along this axis through cell-cell intercalation  
146 (Suppl. Fig. 3; Hotta et al., 2007). Interestingly, during st. 19 to st. 22, the early  
147 phase of epidermal cell-cell intercalation when ventroflexion occurs, intercalation  
148 was not associated by an AP elongation of the ventral tail, while during later stages  
149 of epidermal cell-cell intercalation from st. 22 to st. 24, intercalation was

150 accompanied by ventral tail elongation (Fig.2AB). We thus hypothesized that  
151 epidermal cell dynamics during the early intercalation period contribute to  
152 ventroflexion. To test this hypothesis, we compared epidermal cell dynamics  
153 between WT and ventroflexion-deficient *Admp* morphant embryos.

154 During st.20 to 22 the ventral epidermis in WT embryos showed a  
155 preferential accumulation of junctional F-actin in the medio-lateral direction (ML  
156 accumulation) (Fig. 2C). Antibody staining of pMLC also showed such ML  
157 accumulation, especially at st. 19 to 22 (Suppl. Fig. 4). In contrast, no such ML  
158 accumulation was observed in *Admp* morphant embryos during st. 20 to 22 (Fig. 2C).  
159 In addition, while the AP/ML aspect ratio of ventral epidermal cells decreased in WT  
160 embryos during st. 18 to 22, no such decrease was found in *Admp* morphants (Fig.  
161 2D). This suggests that *Admp* is required for proper asymmetric junctional actin  
162 accumulation and ML elongation of ventral epidermal cells during early intercalation.  
163 At st. 24, the tail epidermis in WT embryos became organized into eight distinct  
164 single-cell rows as a result of cell-cell intercalations (Fig. 2EF) (Hotta et al., 2007;  
165 Pasini et al., 2006). Moreover, these eight rows, consisting of three rows of dorsal,  
166 two rows of lateral, and three rows of ventral epidermal cells, were closely aligned  
167 (Fig. 2F, WT). In contrast, the ventral three-rows in *Admp* morphant embryos were  
168 disorganized into one or two rows, making it difficult to clearly distinguish between  
169 midline and medio-lateral cells (Fig. 2F, *Admp* MO; mixed orange/red color).  
170 Dorsomorphin-treated embryos showed a similar disordered ventral midline  
171 intercalation phenotype (Suppl. Fig. 5), further supporting the notion that *Admp*  
172 regulates ordered ventral epidermal cell-cell intercalation.

173

#### 174 **Ventral epidermal cells display a ‘boat-like’ morphology during ventroflexion**

175 We suspected that defective ventroflexion in *Admp* morphant embryos  
176 involves changes in ventral epidermal cell morphologies (Fig. 2F). To further  
177 investigate what detailed morphological change occurs in the ventral epidermal cells  
178 during this period, we monitored changes in single ventral epidermal cell

179 morphology by 3D imaging. This revealed that ventral epidermal cells acquire a  
180 distinctive ‘boat-like’ morphology (boat-cell), characterized by a larger area on the  
181 basal surface (Fig. 3AB, yellow areas) as compared to the apical surface (Fig. 3AB,  
182 red areas), and ridges at both ends oriented along the ML direction. Almost all  
183 anterior ventral epidermal cells showed this shape (Suppl. Mov. 2), consistent with  
184 previous reports that tail bending only occurs in the anterior tail of *Ciona* (Lu et al.,  
185 2020). The shape of boat-cell is characterized by a triangular-shaped cross-section  
186 where the apical surface is entirely constricted (triangular-shaped section of boat-  
187 cell; TSBC), and a square-shaped cross-section (square-shaped section of boat-cell;  
188 SSBC), where some apical surface is left (Fig. 3A, B). In *Admp* morphant embryos at  
189 st. 22, the number of TSBCs in ventral epidermal cells was strongly reduced (Fig. 3D  
190 and 3E; *Admp* MO, N= 12, WT, N = 7,  $p = 0.05 \times 10^{-5}$ ), while the number of non-  
191 TSBCs was increased (the section of non-boat cell) indicative of a reduced number  
192 of boat-cells in all ventral epidermis sections of morphant embryos (Suppl. Mov. 2).

### 193 ***Admp*/BMP signaling is required for the localization of the pMLC to the apical** 194 **side of ventral epidermal cells**

195 To understand how this distinctive boat-cell morphology (Fig. 3A and 3B)  
196 arises, we performed both F-actin/Phalloidin staining and antibody staining for  
197 pMLC. This showed an accumulation of both F-actin and pMLC at the apical side of  
198 TSBC (Fig. 4A, WT arrowheads, 4B). Interestingly, the localization of pMLC to the  
199 apical side was significantly decreased in *Admp* morphant embryos (Fig. 4C; *Admp*  
200 MO, n = 7, WT, n = 9,  $p = 0.01$ ), suggesting that *Admp* triggers the formation of  
201 TCBCs, and thus boat-cell shape, by localizing pMLC to the apical side of ventral  
202 midline cells.

203 To test whether *Admp*/BMP signaling can ectopically affect the localization  
204 of pMLC and thereby generate TSBC (Fig. 4D), we performed ectopic *BMP*-  
205 expression experiments. In WT embryo, both apical pMLC accumulation and TSBCs  
206 were not observed in epidermal cells except ventral epidermal cells, where also  
207 pSmad signal was detected (Fig. 4D, a frontal section of WT). In contrast, in

208 embryos ectopically expressing BMP, pSmad signal was detected in all epidermal  
209 cells, accompanied by apical pMLC accumulation and TSBC formation not only in  
210 ventral tail epidermal cells but also within the remainder of the tail epidermis (Fig.  
211 4D).

212 These suggests that Admp/BMP signaling is sufficient to induce the  
213 localization of pMLC to the apical side of epidermal cells (Fig. 4E), leading to the  
214 formation of boat-cells. This cell shape change, again, might resist tail elongation at  
215 the ventral tail region, leading to ventroflexion.

216

### 217 **Cutting ventral epidermal cells relaxes ventroflexion**

218 To investigate whether the ventral epidermis indeed locally resists tail  
219 elongation, eventually leading to ventroflexion, we cut either ventral or dorsal  
220 epidermal cells at their apex along the AP axis using an ultraviolet (UV)-laser cutter  
221 (Fig. 5, yellow lines). When dorsal midline epidermal cells were cut, no effect was  
222 observed. However, cutting ventral midline epidermal cells led to a strong relaxation  
223 of ventroflexion, indicative of stress-release along with the AP axis at the ventral  
224 midline epidermal cells (Fig. 5A and 5B, Suppl. Mov. 3). These findings suggest that  
225 apically accumulated pMLC in boat-cells generate AP stress in the ventral midline  
226 epidermis, resisting tail elongation and thus enabling ventroflexion.

227 We further investigated whether the relaxation of ventroflexion by UV-laser  
228 cutting depends on whether the cuts were oriented along the AP axis or ML axis in  
229 ventral midline cells. This showed that the relaxation of ventroflexion was slower in  
230 AP cuts when compared to ML cuts (Suppl. Mov. 4), consistent with ML cuts more  
231 efficiently interfering with the AP stress in the ventral epidermis midline than AP  
232 cuts.

233

### 234 **pMLC localization predicts development of boat-cell morphology**

235 Next, we asked how boat-cells change their shape during the ventral tailbud  
236 period (Fig. 6A). To this end, we analyzed the subcellular distribution of pMLC as



237 proxy of actomyosin contraction in ventral midline cells (ventral view in Suppl. Fig.  
238 4). This revealed that pMLC first emerged at the ML junction of ventral midline  
239 epidermal cells at st. 21 (Fig. 6A, st. 21 arrowheads), and localized to the apical side  
240 of TSBCs at st. 22 (Fig. 6A, st. 22 arrowheads). At st. 23, the trapezoid shape  
241 became apparent at the midline plane (Fig. 6, st. 23; Suppl. Fig. 4), and finally, the  
242 apical accumulation of pMLC disappeared at st. 24 (Fig. 6, st. 24; Suppl. Fig. 4).  
243 These observations suggesting that TSBC formation is driven by ML contraction as  
244 follow. The ML directed localization of pMLC and the cell shape change to boat-cell  
245 correspond with ventroflexion, and the pMLC disappearance and the cell shape  
246 change to disengage the boat-like morphology correspond with relaxation.  
247

## 248 **Discussion**

### 249 ***Admp* is an upstream regulator of tail bending**

250 Originally, the *Admp*/BMP pathway was identified as central in establishing,  
251 maintaining, and regenerating the DV axis among bilaterian animals (Gaviño and  
252 Reddien, 2011). In the ascidian, both gain- and loss-of-function experiments  
253 demonstrated that *Admp* expressed in the B-line medial vegetal cells acts as an  
254 endogenous inducer of the ventral epidermis midline (Pasini et al., 2006). *Admp* is  
255 required for sensory neuron differentiation of the ventral epidermis via the *Tbx2/3*  
256 and *Msx* genes (Waki et al., 2015). Our finding that tail bending was not regulated  
257 by *Msx* (Suppl. Fig. 1C) suggests that *Admp* functions in ascidian tail bending  
258 through different effector pathway(s) than those implicated in ventral epidermal cell  
259 fate specification. *Admp* controls ventral, but not dorsal tail bending by determining  
260 early ventral epidermal cell intercalation (Fig. 2), and the shape of ventral epidermal  
261 midline cells (Fig. 3) through the localization of pMLC (Fig. 4). Importantly, this  
262 does not exclude that genes other than *Admp* act on tissues other than the ventral  
263 epidermis to control ventroflexion.  
264

265 **Admp controls ordered cell-cell intercalation of ventral epidermal cells**

266 We divided the intercalation period into two phases: during early  
267 intercalation, the ventral epidermis does not elongate in an AP direction; during late  
268 intercalation, in contrast, the ventral epidermis elongates. Interestingly, ventral tail  
269 bending (ventroflexion) occurs during early intercalation, with ventral epidermal  
270 cells displaying a flat cell shape elongated along the ML axis (Fig. 2C, D). We  
271 assume that this ML cell elongation is caused by the accumulation of actomyosin in  
272 ML-oriented protrusion-like extensions of ventral epidermal cells (Fig. 6B)  
273 extending cells along the ML axis (Suppl. Fig. 7). No such actomyosin localization  
274 and ML elongation was found in *Admp* morphant embryos, suggesting that *Admp* is  
275 required for ventral epidermal cell polarization and protrusion formation.

276 When ventral epidermal cell intercalation is completed (st. 24~), ventral  
277 epidermal cells drastically change their polarity into the AP direction in WT embryos.  
278 This does not occur to the same extent in *Admp* morphants (Fig. 2D), suggesting that  
279 *Admp* is also required for this later shift in cell polarity.

280 Ventral tail epidermal cells in WT, but not *Admp* morphant embryos, arrange  
281 into three ordered rows at st. 24. This suggests that *Admp* may be required for the  
282 cell autonomous ML intercalation of ventral epidermal cells by controlling ML cell  
283 polarization and protrusion formation. Notably, in *Admp* morphants, the ventral  
284 epidermis was disordered but kept a three-cell width, suggesting that some  
285 intercalation of ventral epidermal cells might still occur in the absence of *Admp*.

286 How does the intercalation of ventral midline cells contribute to  
287 ventroflexion? The ventral epidermis undergoing early cell intercalation does not  
288 elongate along the AP axis from st. 20 to st. 22, different from the already fully  
289 intercalated dorsal epidermis (Fig. 2B). Assuming that the notochord functions as the  
290 main force-generating structure driving tail elongation (Dong et al., 2011; Hara et al.,  
291 2013; Lu et al., 2019), the lack of ventral epidermis elongation during st. 20 to st. 22  
292 might locally resist the global notochord-mediated tail elongation, thereby causing  
293 the tail to bend ventrally. The lack of ventral epidermis elongation along the AP  
294 direction during early intercalation is likely due to the *Admp*-dependent polarization

295 of ventral epidermal cells along the ML direction. This cell polarization  
296 perpendicular to AP direction will limit epidermal AP elongation during intercalation,  
297 which again, by resisting global notochord-driven tail elongation, leads to  
298 ventroflexion.

299

### 300 **Admp regulates ventral epidermal cell shape changes**

301 Ventral epidermal cells take a distinct boat-cell shape, which likely  
302 contributes the ventroflexion (Fig. 4). The preferential accumulation of pMLC in  
303 ventral epidermal cells along ML junctions (Suppl. Fig. 4Db', Eb') is found at the  
304 apical side of cell boundaries of TSBC and/or SSBC and might correspond to  
305 protrusion-like extensions formed between interdigitating boat cells (Fig. 6B). The  
306 lack of such polarized distribution of pMLC suggests that Admp might be required  
307 for both planar and apicobasal polarization of these cells.

308 As the cell-cell intercalation of the boat cell progresses, the shape of these  
309 cells changes from TSBC to a trapezoid shape (Fig. 6A). This shape change occurs  
310 during the late intercalation period (Fig. 2B) and leads to ventral epidermis  
311 elongation along the AP axis (Fig. 6B, green dotted line). Thus, ventral epidermal  
312 cell elongation along the ML axis during early intercalation locally resist notochord-  
313 mediated tail elongation, thereby triggering ventroflexion (Fig. 6B, st. 20 to 22).  
314 During later intercalation, in contrast, the ventral epidermal midline cells enlarge  
315 their apical area and elongate along the AP axis, thereby relaxing the local resistance  
316 against tail elongation (Fig. 6B, yellow dotted line st. 23).

317 How does Admp/BMP signaling regulate both the cell-cell intercalation and  
318 the apico-basal polarity of the ventral epidermal cells? Our finding suggest that  
319 Admp is required for the preferential localization of pMLC not only at ML junctions  
320 between intercalating cells (Suppl. Fig. 4) but also at the apical side by pSmad  
321 signaling (Fig. 4D). Recent studies show that SMAD3 drives cell intercalation  
322 underlies secondary neural tube formation in the mouse embryo (Gonzalez-Gobartt  
323 et al., 2021). Moreover, the BMP-Rho-ROCK1 pathway is thought to target MLC to

324 control actin remodeling in fibroblasts (Konstantinidis et al., 2011). Finally, BMP  
325 regulates cell adhesion during vertebrate neural tube closure and gastrulation (von  
326 der Hardt et al., 2007; Smith et al., 2021). Yet, how BMP/Smad signaling regulates  
327 the localization of the pMLC in ventral epidermal cells is still unclear.

328

### 329 **Model of ascidian ventroflexion**

330 Our findings demonstrate that *Admp* is required for ventroflexion of the  
331 ascidian tail during tailbud stages (st. 18 to st. 22). We propose that *Admp*  
332 phosphorylates Smad in the ventral epidermis. pSmad, in turn, allows early cell  
333 intercalation within the ventral epidermis by controlling the localization of the pMLC  
334 leading to ventral epidermal cells taking a boat-cell-like shape. This cell shape  
335 change limits ventral epidermis elongation along the AP axis, thereby locally  
336 resisting global notochord-driven tail elongation causing the tail to bend down (Fig.  
337 6).

338 The notochord has recently been proposed to display asymmetric contraction  
339 forces before st. 20 by the asymmetrical localization of actomyosin in notochord  
340 cells (Lu et al., 2020). However, *Admp* morphant embryos displaying straight tails  
341 still have ventral bias in notochord actomyosin localization (Suppl. Fig. 2). This  
342 suggests that *Admp* is not required for asymmetrical notochord actomyosin  
343 localization, and that this asymmetric localization is not sufficient to cause  
344 ventroflexion. One possibility is that the ventral accumulation of actomyosin in the  
345 notochord might be involved in earlier morphogenetic events, such as notochordal  
346 cell intercalation, giving rise to a transient ventral groove (Munro and Odell, 2002).  
347

### 348 **The evolutionary roles of *Admp***

349 Our study provides insight into the molecular and mechanical mechanisms  
350 underlying conserved shape changes of chordate embryos, such as tail bending. Tail  
351 bending in the tailbud stage embryos is a still understudied morphogenetic process  
352 although many genes, including *Admp*, with a critical function in tail bending have

353 been identified [zebrafish: (Esterberg et al., 2008; Willot et al., 2002); frog: (Dosch  
354 and Niehrs, 2000; Kumano et al., 2006)]. In invertebrate non-chordate animals, such  
355 as sea urchins and hemichordates, Admp is expressed within the embryonic ectoderm  
356 (Chang et al., 2016; Lowe et al., 2006). It would thus be interesting to investigate  
357 whether the regulation of pMLC subcellular localization by Admp is conserved in  
358 primitive chordate embryogenesis and causes the body shape change in these animals.

359

360

## 361 **Materials and methods**

### 362 **Ascidian samples**

363 *C. robusta* (*C. intestinalis* type A) adults were obtained from Maizuru Fisheries  
364 Research Station (Kyoto University, Kyoto, Japan), Onagawa Field Center (Tohoku  
365 University, Sendai, Japan), and Misaki Marine Biological Station (University of  
366 Tokyo, Tokyo, Japan) through the National Bio-Resource Project (NBRP, Japan) and  
367 Roscof Marine Station (Roscof, France). Eggs were collected by dissection of the  
368 gonoducts. After artificial insemination, fertilized eggs were incubated at 20°C until  
369 fixation or observation. Developmental stages followed Hotta's stages (Hotta et al.,  
370 2007; Hotta et al., 2020). In inhibiting phosphorylation of 1P myosin, Y27632  
371 (nacalai tesque, Japan) was applied to embryos at 10 µM after 7 hpf (late neurula, st.  
372 16). Dorsomorphin (Sigma-Aldrich) was applied to embryos at 10 µM after  
373 fertilization.

374

### 375 **Immunostaining and quantifying pMLC intensity**

376 To detect activation of the Admp/BMP signaling pathway, we followed the same  
377 method described previously (Waki et al., 2015). The signal was visualized with a  
378 TSA kit (Invitrogen) using horseradish peroxidase-conjugated goat anti-rabbit  
379 immunoglobulin-G and Alexa Fluor 488 tyramide.

380 The method of pMLC antibody staining was as follows. Embryos were fixed  
381 in 3.7% formaldehyde in seawater for 30 min and then rinsed with phosphate-

382 buffered saline with Tween (PBST; 0.2% Triton-X in PBS) for 3 h. Embryos were  
383 incubated in PBST containing 10% goat serum for 3 h at room temperature or  
384 overnight at 4°C. The primary antibody (anti-rabbit Ser19 phosphorylated-1P-  
385 myosin, Cell Signaling, USA) was diluted at 1:50 and then incubated for 3 h at room  
386 temperature or overnight at 4°C. The primary antibody was washed with PBST for 3  
387 h. A poly-horseradish peroxidase (HRP) secondary antibody (goat anti-rabbit IgG,  
388 Alexa Fluor 488 Tyramide SuperBoost Kit, USA) was applied for 3 h and washed in  
389 PBST for 3 h. Alexa Fluor dye tyramide (Alexa Fluor 488 Tyramide SuperBoost Kit)  
390 was added to the reaction buffer for 5 to 8 min to induce a chemical HRP reaction.  
391 Embryos were dehydrated through an isopropanol series and finally cleared using a  
392 2:1 mixture of benzyl benzoate and benzyl alcohol.

393 pMLC accumulation was quantified by measuring the intensity along the  
394 ventral tail epidermis using Fiji image analysis software. The signal in the brain  
395 region was taken as the positive control because its signal was detected even in  
396 Y27632 treated embryos, indicating RhoA kinase (ROCK)-independent expression.  
397 The relative intensity of pMLC normalized to the intensity of the brain region in each  
398 individual was calculated by ImageJ for the comparative analysis among different  
399 individuals.

400

#### 401 **Laser-cutter experiment**

402 UV-laser cutting experiments were performed on tailbud *Ciona* embryos. An  
403 inverted Axio Observer Z1 (Zeiss) microscope equipped with a confocal spinning  
404 disk (Andor Revolution Imaging System, Yokogawa CSU-X1), a Q-switched solid-  
405 state 355 nm UV-A laser (Powerchip, Teem Photonics), a C-APOCHROMAT  
406 63x/1.2 W Korr UV-VIS-IR water immersion objective (Behrmdt et al., 2012), and a  
407 home-made cooling stage were used. The membrane of tail epidermal cells of tailbud  
408 embryos was labeled with FM-64 (ThermoFisher). Each ventral midline epidermal  
409 cell was cut along the apico-basal axis (5 to 10  $\mu$ m lines each) by applying 25 UV  
410 pulses at 0.7 kHz. The embryos were imaged every 0.2 s frame rate with an exposure

411 time of 150 ms. Single fluorescent images were used to measure tail relaxation 3 s  
412 post-ablation, and the percentage of relaxation was calculated as the area of  
413 movement of the tail region 3 s after laser cutting.

414

#### 415 **Gene knock-down and overexpression**

416 The MOs (Gene Tools, LLC) against *Msx**b* and *Admp*, which block translation, were  
417 designed according to the previous study (Imai et al., 2006; Waki et al., 2015);  
418 *Admp*, 5'-TATCGTGAGT TTGCTTTCTATATA-3'; *Msx**b*, 5'-  
419 ATTCGTTTACTGTCATTTTAAATTT-3'. These MOs at 0.25 to 0.50 mM were  
420 injected into an unfertilized egg and incubated until observation. To know the  
421 phenotype of *Admp* MO embryo at the single-cell level, embryos were stained by  
422 Alexa 546 phalloidin (Thermo Fisher).

423 The DNA constructs used for overexpression of *bmp2/4* under the *Dlx.b*  
424 upstream sequence (Ciinte.REG.KH.C7.630497–632996|*Dlx.b*) were used previously  
425 (Imai et al., 2012). These DNA constructs were introduced by electroporation.

426

#### 427 **Figure legends**

428 **Fig. 1 *Admp* affects the tail bending of early tailbud stage embryo, and pSmad**  
429 **was detected at ventral midline epidermis.**

430 (A) Time-lapse movie of WT and *Admp* MO embryos (N = 6/6). WT and *Admp* MO  
431 embryos were developed in the same dish, and WT embryos were stained by  
432 NileBlue B to distinguish them. Note that *Admp* MO suppressed ventral tail bending  
433 (“ventroflexion”) during early to mid tailbud stages (red double-headed arrow) but  
434 not dorsal tail bending (“dorsiflexion”) during the late tailbud stage (yellow double-  
435 headed arrow) after “relaxation” (blue double-headed arrow) at the beginning of late  
436 tailbud stage. The developmental stage and time after fertilization are shown in each  
437 WT picture. Scale bar = 100  $\mu$ m. A: anterior, P: posterior, D: dorsal, and V: ventral.  
438 (B) The definition of the bending angle. The bending angle of the embryo tail was

439 defined as the intersection angle of the straight line perpendicular to the neural tube  
440 of the trunk and the anterior-posterior border of the notochord cell, which is the 20th  
441 from the anterior side. (C) Quantifying the bending angle  $\theta$  of WT (n = 8) and *Admp*  
442 MO (n = 5~15) embryo at st. 18, st. 20, and st. 22. The bending angle was  
443 significantly reduced in *Admp* MO embryos. (D) Quantification of the bending angle  
444  $\theta$  of WT (n = 8), DMSO-treated embryos (n = 6~7), and Dorsomorphin-treated  
445 embryos (n = 9~12). The bending angle was significantly reduced in Dorsomorphin-  
446 treated embryos.  
447 (E) An antibody staining against phosphorylated Smad1/5/8 (green). The  
448 *Admp*/BMP signals were detected from the late gastrula at ventral midline cells in  
449 WT (parenthesis). On the other hand, no signals were detected in *Admp*-MO. Ectopic  
450 signals were detected at the whole-epidermal cells in the *Dll-b>Bmp2/4* embryo  
451 (right bottom panel). Scale bar = 50  $\mu$ m.

452

453 **Fig. 2 Comparison of the phenotype of *Admp* MO with WT embryo.**

454 (A) The measurement of the tail length of the dorsal side (red line) and the ventral  
455 side (blue line).

456 (B) Time course of dorsal outline length (red line) and the tail region's ventral  
457 outline length (blue line). Dorsal A-P length of the tail epidermis (red) increases  
458 earlier than that of ventral A-P (blue). The ventral A-P length does not change during  
459 early intercalation (red double-headed arrow). So, the gap between them is increasing  
460 in this period. The ventral A-P length increased at late intercalation (double-headed  
461 arrow), and the gap decreased. Each dotted line indicates the corresponding  
462 developmental *Ciona* stage. At stage 24, the dorsal A-P and ventral A-P have the  
463 same length.

464 (C) The cell shape change of anterior ventral epidermis of WT and *Admp* morphant  
465 during early intercalation. The figures show the ventral view. The F-actin was  
466 stained by phalloidin. The cell shape was traced with a white line. In all figures, the  
467 anterior ventral tail epidermal cells were perpendicular to the direction of observation  
468 and enclosed a scale bar: of 20  $\mu$ m.



469 (D) The AP/ML aspect ratio of the ventral epidermis of WT and *Admp* morphant  
470 during early intercalation in Figure 2C was measured with reference to the rectangle  
471 to AP-ML direction (WT; st.18 n = 14, st.20 n = 19, st.22 n = 10; *Admp* MO; st.18 n  
472 = 10, st.20 n = 16, st.22 n = 16). Asterisk indicates statistically significant (t-test, \*:  
473  $p < 0.05$ ). The error bar indicates SD.

474 (E) The schematic alignment of the tail epidermal cells of WT embryo at st. 24. The  
475 cell-cell intercalation of the tail epidermis has finished at st. 24. The tail epidermal  
476 cells consist of eight rows: dorsal (yellow), two dorsal medio-lateral (green), ventral  
477 (red), two ventral medio-lateral (orange), and two lateral (blue) rows.

478 (F) The alignment of the tail epidermal cells of WT and *Admp* MO embryo at st. 24.  
479 There is a specific inhibition of the intercalation of the ventral rows (red and orange)  
480 in the *Admp* MO embryo (N = 4 in WT and 4 in *Admp* MO). These mixed colors  
481 indicate that we cannot distinguish ventral and ventrolateral epidermal cells, scale  
482 bar: 10  $\mu\text{m}$ .

483

484 **Fig. 3 Three-dimensional reconstruction of ventral midline epidermal cells**  
485 **during tail bending.**

486 (A) The 3D model reflecting the shape of each midline ventral epidermal cell at st.  
487 22 was reconstructed using Avizo6 software (inside of red rectangular).

488 Representative morphology of ventral midline cells is shown (inside the green  
489 rectangle). Each cell is bipolar laterally and has protrusions from basal parts. Note  
490 that the apical area (red) is smaller than the basal area (yellow).

491 (B) The 3D model reflects the shape of ventral epidermal cells in (A). The ventral  
492 epidermal cells show a distinctive shape, a “boat cell”. The sections of the boat cell  
493 show triangular-shaped (TSBC) or square-shaped (SSBC) depending on the plane.

494 (C) Schematic drawing of the cell-cell intercalation of the ventral midline epidermal  
495 cells using boat cells during the tail bending period. The ventral midline epidermis  
496 consists of boat cells with a smaller apical domain area than the basal domain; the  
497 overall tissue becomes bending (blue arrow). The orange cell’s midline section (cut  
498 in the red dotted plane) shows TSBC. The orange cell starts intrusion from

499 basolateral sides with pMLC protrusions (red-colored). The 3D models were  
500 generated by FUSION 360 educational ver. (Autodesk).  
501 (D) Midline section view of WT tailbud embryo and *Admp* MO embryo at st. 22 by  
502 staining of F-actin. Arrowheads indicate the position of TSBC. The regions in a  
503 yellow rectangle are enlarged, showing a TSBC. The regions in a green rectangle are  
504 enlarged, showing an SSBC.  
505 (E) The ratio of the number of TSBC and the number of midline cells. It has been  
506 reported that the driving forces of the tail bending originate in the anterior part of the  
507 tail (Lu et al., 2020). Therefore, we counted the number of TSBC in the anterior part  
508 of the tail. TSBCs were significantly reduced in *Admp* MO embryos. Asterisks  
509 indicate statistical significance (t-test, \*:  $p < 0.05$ ). The error bar indicates SD (WT, N  
510 = 8; *Admp* MO, N = 6).

511

512 **Fig. 4 The distribution of pMLC of tail epidermis depends on the *Admp*/BMP**  
513 **pathway.**

514 (A) Double staining of F-actin and phosphorylated myosin light chain (pMLC) of the  
515 ventral midline of WT and *Admp* MO embryo at st. 22. Both F-actin and pMLC  
516 accumulated at the apical side of triangular cells (arrowheads). The loci of the  
517 measurement of the relative pMLC intensity ratio between the apical and basal side  
518 of the epidermis in WT and *Admp* MO(B) are shown as yellow lines.

519 (B) The 3D model of a boat cell reflecting the localization of pMLC (red colored).  
520 Different section planes show different shapes, triangular-shape, TSBC, and square-  
521 shape, SSBC.

522 (C) Relative pMLC intensity ratio between the apical and basal side of the epidermis  
523 in WT (N = 10, n = 10) and *Admp* MO (N = 7, n = 7). Asterisks indicate statistical  
524 significance (t-test, \*:  $p < 0.05$ , \*\*:  $p < 0.01$ ). The error bar indicates SD.

525 (D) The distribution of pMLC in WT and *Dll-b>Bmp2/4* at st. 22. In the midline  
526 section, the pMLC was distributed at the apical TSBCs of the ventral midline  
527 epidermis in both WT and *Dll-b>Bmp2/4* (arrows in red rectangles). On the other  
528 hand, in the frontal section, the apical TSBCs of the lateral epidermis were observed

529 in *Dll-b>Bmp2/4* embryo (arrows inside the orange rectangle), but there was no  
530 signal of pMLC in the lateral epidermis in WT. The white dotted lines indicate the  
531 section plane of the frontal sections.

532 (E) The schematic of the difference in the distribution of pMLC (red) among WT,  
533 *Admp* MO, and *Dll-b>Bmp2/4* embryos. The orange-colored cell sections are TSBC.  
534

535 **Fig. 5. Laser-cut experiment for the AP cell-cell border of the tail epidermis.**

536 (A) Laser-cutting of the wild type's dorsal and ventral midline epidermis at st. 22.  
537 Epidermal cells are a monolayer. We cut each cell in an apico-basal direction (yellow  
538 lines). Cell membranes were stained by FM4-64. The color bar indicates the time  
539 after laser cut from 0 (before) to 30 (after) s post cut. (B) The movement of the area  
540 before and after the laser cut was calculated as relaxation (N = 5). Asterisks indicate  
541 statistical significance (t-test, \*:  $p < 0.05$ ). The error bar indicates SD.

542

543 **Fig. 6. Relationship between the change of the distribution of pMLC and the tail**  
544 **bending during intercalation of midline epidermal cells.**

545 (A) (top) The antibody staining of 1-phosphorylated-myosin (pMLC) from st. 20 to  
546 24 in WT. Scale bar = 50  $\mu\text{m}$ . (middle) The enlarged view of the dotted rectangle in  
547 each stage. Arrowheads show pMLC accumulation in the apical domain of the  
548 ventral midline epidermal cells. (bottom) The schematic drawing of the distribution  
549 of pMLC (shown in red). In st. 20, pMLC localized the basal side of the epidermis.  
550 In st. 21, pMLC has appeared at the AP cell border of ventral midline epidermal cells.  
551 At st. 22, the pMLC accumulated at the apex of the apical domain and the cell shape  
552 changed into TSBC of the boat cell in Figure 3C (orange-colored cell). The pMLC  
553 localization at the basal side was reduced. At st. 23, the apex of the apical domain  
554 becomes broader. At st. 24, the pMLC asymmetrical distribution disappears.  
555 (B) The schematic model explains the halt of the AP elongation during the early  
556 intercalation period. At the beginning of the intercalation, the total AP length of the  
557 midline cells was shown as a green arrow (st. 20). During early intercalation, the  
558 ventral epidermal cells change cell shape to become boat cells. The boat cells start to

559 intrude on each other from the basal plane. Still, the total AP length of the apical side  
560 was not changed (green arrow) because apically accumulated pMLC (st. 22) resists  
561 the AP elongation force of the notochord. In late intercalation, the boat cell  
562 intercalates the basal side and the apical side, and the apical area increases, allowing  
563 the elongation of AP length (yellow arrow) of the apical side (st. 23).

564 (C) Model of embryonic tail bending in *Ciona*. Admp/BMP signaling (green dots)  
565 transmits the signal to the ventral midline epidermal cells as phosphorylated Smad  
566 from neurula to the initial tailbud. pSmad translocates the localization of the pMLC  
567 from the basal side (dorsal side) to the apical side (ventral side), which changes the  
568 cell polarity and promotes the cell-cell intercalation of the ventral midline epidermal  
569 cells during early to mid-tailbud stages (st. 20 to st. 23). The ongoing mediolateral  
570 intercalation at the ventral epidermis confers a resistance (red arrowheads) to AP  
571 elongation force (white arrow) that is possibly provided by the notochord, which  
572 causes the bending tail shape in the *Ciona* tailbud embryo at st. 22. Conversely, the  
573 *Admp* MO or dorsomorphin treatment disrupts the cell polarity and causes the no tail-  
574 bending embryo at st. 20–23 and incomplete intercalation at st. 24 (the flow by the  
575 green rectangle). The final overall embryo shape at st. 24 is similar among WT and  
576 *Admp* MO embryos, but the ventral cell-cell intercalation was disrupted (red and  
577 orange gradation-colored cells). Thus, Admp/BMP signaling, apart from its known  
578 role in peripheral nervous system (PNS) differentiation, regulates temporal tail  
579 bending during early to middle tailbud stages (st. 20 to st. 23).

580

581 **Suppl. Mov. 1. Time-lapse movie of WT (left) and *Admp* MO (right) embryo**  
582 **from late neurula stage 16 to late tailbud stage 25.**

583 Both embryos are incubated in the same dish. The WT embryo was stained with  
584 NileBlue B (Matsumura et al., 2020). The movie frame was surrounded by different  
585 colors depending on the tail morphology. red: ventroflexion, blue: relaxation of  
586 ventroflexion, yellow: dorsiflexion.

587

588 **Suppl. Mov. 2. The z-stack section of the ventral epidermis**

589 The z-stack images of the ventral midline of the tailbud embryo by phalloidin  
590 staining. All the section of the ventral epidermis of the WT and the *Admp* MO  
591 embryo was observed at st.22. The F-actin was stained by phalloidin. The  
592 arrowheads indicate the TSBC.

593 **Suppl. Mov. 3. Laser cutting experiment of the midline tail epidermis.**

594 The dorsal (left) and ventral (right) midline epidermal AP cell borders of the WT  
595 mid-tailed embryos were cut with a laser cutter. The arrowheads indicate the cutting  
596 point by the laser cutter. The angle of the ventroflexion was relaxed when cut on the  
597 ventral side but not on the dorsal side, indicating the AP stress of the ventral midline  
598 epidermis (N = 3 each).

599

600 **Suppl. Mov. 4. The laser cut of the ventral epidermis with ML and AP direction.**

601 The ventral epidermis of the mid-tailbud embryo was cut in AP and ML directions with a  
602 laser cutter.

603

604 **Suppl. Fig. 1. Morphants of tail bending.**

605 (A) Mid-tailbud stage embryo of WT, DMSO treatment, and dorsomorphin. DMSO  
606 and dorsomorphin were treated after the mid neurula stage (st. 15). The  
607 dorsomorphin-treated embryo did not bend its tail, similar to the *Admp* MO embryo  
608 (Fig.1A).

609 (B) Midline section view of WT dorsomorphine-treated and *Admp* MO embryo at st.  
610 18, st. 20, and st. 22 by F-actin staining. The dorsomorphin-treated embryo did not  
611 bend its tail (N = 10/10, 12/12 and 9/9), similar to the *Admp* MO embryo (N = 5/5,  
612 13/13 and 15/15).

613 (C) The phenotype of *Msx-b* MO embryo at st. 22 in one experiment. The ventral tail  
614 bending was normally observed. Note that similar phenotypes were reported (Waki

615 et al., 2015).

616 Abbreviations: A, anterior; D, dorsal; V, ventral; P, posterior

617

618 **Suppl. Fig. 2. The asymmetrical actomyosin localization of the notochord.**

619 (A) F-actin localization of notochord in WT and *Admp* MO was measured on the  
620 yellow lines across the dorso-ventral (DV) axis. Abbreviations: A, anterior; D,  
621 dorsal; V, ventral; P, posterior.

622 (B) The intensity ratio between ventral and dorsal F-actin. The ratio is calculated  
623 from the peak intensity values in (A) data. If the intensity of the ventral side (red  
624 arrow in A) is stronger than the dorsal side (orange arrow in A), the ratio becomes  
625 more than 1. In *Admp* MO embryos, asymmetrical localization remained. F-actin is  
626 significantly localized ventrally (WT, N = 8; *Admp* MO, N = 10). Asterisks indicate  
627 statistical significance (t-test, \*:  $p < 0.05$ ). The error bar indicates SD.

628

629 **Suppl. Fig. 3. The alignment of the tail midline epidermal cells during the**  
630 **tailbud period.**

631 From 3D reconstructed confocal stack images by F-actin staining of tailbud embryos  
632 (st. 18 in A, st. 19 in B, st. 20 in C, st. 21 in D, st. 22 in E, st. 23 in F and st. 24 in G),  
633 cell shapes of both dorsal and ventral midline epidermal cells are traced (yellow  
634 lines). Note that cell-cell intercalation completes earlier on the dorsal midline than on  
635 the ventral midline.

636

637 **Suppl. Fig. 4. pMLC antibody staining during tailbud period.**

638 (Aa–Hc') Antibody staining of pMLC from st. 18 to st. 24 in wild type (rows A to G)  
639 and st. 22 in Y27632-treated (row H) embryos. Arrowheads show pMLC  
640 accumulation in the ventral midline epidermal cells. The part surrounded by the  
641 dotted square is enlarged to the panel on the right. Brackets indicate the range of the

642 midline epidermal region. The midline epidermal cells are intercalated, narrowing  
643 the region (see Suppl. Fig. 2). Scale bar = 20  $\mu\text{m}$ .

644

645 **Suppl. Fig. 5. The alignment of the tail epidermal cells of DMSO-treated and**  
646 **Dorsomorphin-treated embryo at st. 24.**

647 The cell-cell intercalation was completed in the DMSO-treated embryo (left), and the  
648 tail epidermal cells consist of eight rows: dorsal (yellow), two dorsal medio-lateral  
649 (green), ventral (red), two ventral medio-lateral (orange), and two laterals (blue)  
650 rows. On the other hand, there is a ventral-side specific inhibition of the intercalation  
651 (red and orange gradation-colored cells) in the dorsomorphin-treated embryo (right).  
652 (N = 2 in DMSO and 2 in dorsomorphin), scale bar: 10  $\mu\text{m}$ .

653

654 **Suppl. Fig. 6. Boat cells make up the bending of the tissue.**

655 (A) Development view of a 3D model schematically showing the boat cell in the  
656 ventral midline epidermis (see Fig. 3A–C).

657 (B) A combination of boat cells ,consist of 7 (A), representing the ventral midline  
658 epidermis during intercalation. (C) Lateral view of (B). The tissue is bending, as  
659 shown in the blue arrow.

660

661

662 **Suppl. Fig. 7. The cell shape change by ML accumulated pMLC during early**  
663 **intercalation.**

664 In the schematic figure of the apical surface of ventral epidermal cells, the red color  
665 indicates the ML localization of actomyosin at the protrusions formed, and the  
666 arrows indicate the contractility of actomyosin. This contractility elongates the  
667 ventral epidermal cells in the ML direction.

668

669

670 **References**

- 671 **Behrndt, M., Salbreux, G., Campinho, P., Hauschild, R., Oswald, F., Roensch, J.,**  
672 **Grill, S. W. and Heisenberg, C.-P.** (2012). Forces Driving Epithelial  
673 Spreading in Zebrafish Gastrulation. *Science (80- )*. **338**, 257–260.
- 674 **Blitz, I. L. and Cho, K. W. Y.** (2009). Finding partners: How BMPs select their  
675 targets. *Dev. Dyn.* **238**, 1321–1331.
- 676 **Chang, Y.-C., Pai, C.-Y., Chen, Y.-C., Ting, H.-C., Martinez, P., Telford, M. J.,**  
677 **Yu, J.-K. and Su, Y.-H.** (2016). Regulatory circuit rewiring and functional  
678 divergence of the duplicate admp genes in dorsoventral axial patterning. *Dev.*  
679 *Biol.* **410**, 108–18.
- 680 **De Robertis, E. M. M.** (2009). Spemann’s organizer and the self-regulation of  
681 embryonic fields. *Mech. Dev.* **126**, 925–941.
- 682 **Dong, B., Deng, W. and Jiang, D.** (2011). Distinct cytoskeleton populations and  
683 extensive crosstalk control Ciona notochord tubulogenesis. *Development* **138**,  
684 1631–1641.
- 685 **Dosch, R. and Niehrs, C.** (2000). Requirement for anti-dorsalizing morphogenetic  
686 protein in organizer patterning. *Mech. Dev.* **90**, 195–203.
- 687 **Esterberg, R., Delalande, J.-M. and Fritz, A.** (2008). Tailbud-derived Bmp4 drives  
688 proliferation and inhibits maturation of zebrafish chordamesoderm.  
689 *Development* **135**, 3891–3901.
- 690 **Gaviño, M. A. and Reddien, P. W.** (2011). A Bmp/Admp Regulatory Circuit  
691 Controls Maintenance and Regeneration of Dorsal-Ventral Polarity in  
692 Planarians. *Curr. Biol.* **21**, 294–299.
- 693 **Gonzalez-Gobartt, E., Blanco-Ameijeiras, J., Usieto, S., Allio, G., Benazeraf, B.**  
694 **and Martí, E.** (2021). Cell intercalation driven by SMAD3 underlies secondary  
695 neural tube formation. *Dev. Cell* **56**, 1147-1163.e6.



- 696 **Hara, Y., Nagayama, K., Yamamoto, T. S., Matsumoto, T., Suzuki, M. and**  
697 **Ueno, N.** (2013). Directional migration of leading-edge mesoderm generates  
698 physical forces: Implication in *Xenopus* notochord formation during  
699 gastrulation. *Dev. Biol.* **382**, 482–495.
- 700 **Hotta, K., Yamada, S., Ueno, N., Satoh, N. and Takahashi, H.** (2007). Brachyury-  
701 downstream notochord genes and convergent extension in *Ciona intestinalis*  
702 embryos. *Dev. Growth Differ.* **49**, 373–382.
- 703 **Hotta, K., Dauga, D. and Manni, L.** (2020). The ontology of the anatomy and  
704 development of the solitary ascidian *Ciona*: the swimming larva and its  
705 metamorphosis. *Sci. Rep.* **10**, 1–16.
- 706 **Imai, K. S., Levine, M., Satoh, N. and Satou, Y.** (2006). Regulatory Blueprint for a  
707 Chordate Embryo. *Science (80-. )*. **312**, 1183–1187.
- 708 **Imai, K. S., Daido, Y., Kusakabe, T. G. and Satou, Y.** (2012). Cis-acting  
709 transcriptional repression establishes a sharp boundary in chordate embryos.  
710 *Science (80-. )*. **337**, 964–967.
- 711 **Konstantinidis, G., Moustakas, A. and Stournaras, C.** (2011). Regulation of  
712 myosin light chain function by BMP signaling controls actin cytoskeleton  
713 remodeling. *Cell. Physiol. Biochem.* **28**, 1031–1044.
- 714 **Kumano, G., Ezal, C. and Smith, W. C.** (2006). ADMP2 is essential for primitive  
715 blood and heart development in *Xenopus*. *Dev. Biol.* **299**, 411–423.
- 716 **Lowe, C. J., Terasaki, M., Wu, M., Freeman, R. M., Runft, L., Kwan, K., Haigo,**  
717 **S., Aronowicz, J., Lander, E., Gruber, C., et al.** (2006). Dorsventral  
718 Patterning in Hemichordates: Insights into Early Chordate Evolution. *PLoS Biol.*  
719 **4**, e291.
- 720 **Lu, Q., Bhattachan, P. and Dong, B.** (2019). Ascidian notochord elongation. *Dev.*  
721 *Biol.* **448**, 147–153.

- 722 **Lu, Q., Gao, Y., Fu, Y., Peng, H., Shi, W., Li, B., Lv, Z., Feng, X. Q. and Dong,**  
723 **B.** (2020). Ciona embryonic tail bending is driven by asymmetrical notochord  
724 contractility and coordinated by epithelial proliferation. *Dev.* **147**, 1–12.
- 725 **Matsumura, K. D., Nakamura, M. J., Koizumi, W. C., Hotta, K. and Oka, K.**  
726 (2020). Different strategies for tissue scaling in dwarf tailbud embryos revealed  
727 by single-cell analysis. *Dev. Biol.* **460**, 215–223.
- 728 **Miyamoto, D. M. and Crowther, R. J.** (1985). Formation of the notochord in living  
729 ascidian embryos. *J. Embryol. Exp. Morphol.* **86**, 1–17.
- 730 **Mizotani, Y., Suzuki, M., Hotta, K., Watanabe, H., Shiba, K., Inaba, K., Tashiro,**  
731 **E., Oka, K. and Imoto, M.** (2018). 14-3-3Ea Directs the Pulsatile Transport of  
732 Basal Factors Toward the Apical Domain for Lumen Growth in Tubulogenesis.  
733 *Proc. Natl. Acad. Sci.* 201808756.
- 734 **Munro, E. M. and Odell, G.** (2002). Morphogenetic pattern formation during  
735 ascidian notochord formation is regulative and highly robust. *Development* **129**,  
736 1–12.
- 737 **Pasini, A., Amiel, A., Rothbacher, U., Roure, A., Lemaire, P. and Darras, S.**  
738 (2006). Formation of the Ascidian Epidermal Sensory Neurons: Insights into the  
739 Origin of the Chordate Peripheral Nervous System. *PLoS Biol.* **4**, e225.
- 740 **Richardson, M. K., Hanken, J., Gooneratne, M. L., Pieau, C., Raynaud, A.,**  
741 **Selwood, L. and Wright, G. M.** (1997). There is no highly conserved  
742 embryonic stage in the vertebrates: implications for current theories of evolution  
743 and development. *Anat. Embryol. (Berl.)* **196**, 91–106.
- 744 **Roure, A. and Darras, S.** (2016). Msxb is a core component of the genetic circuitry  
745 specifying the dorsal and ventral neurogenic midlines in the ascidian embryo.  
746 *Dev. Biol.* **409**, 277–287.

- 747 **Sander, K.** (1983). The evolution of patterning mechanisms: gleanings from insect  
748 embryogenesis and spermatogenesis. In *Development and Evolution* (ed.  
749 GoodwinBC, HolderN, W.), pp. 137–161. Cambridge University Press.
- 750 **Sehring, I. M., Dong, B., Denker, E., Bhattachan, P., Deng, W., Mathiesen, B. T.**  
751 **and Jiang, D.** (2014). An Equatorial Contractile Mechanism Drives Cell  
752 Elongation but not Cell Division. *PLoS Biol.* **12**, e1001781.
- 753 **Smith, H. M., Khairallah, S. M., Nguyen, A. H., Newman-Smith, E. and Smith,**  
754 **W. C.** (2021). Misregulation of cell adhesion molecules in the Ciona neural tube  
755 closure mutant bug-eye. *Dev. Biol.* **480**, 14–24.
- 756 **Spemann, H.** (1987). Embryonic Induction. *Am. Zool.* **27**, 575–579.
- 757 **Ubisch, V. L. v.** (1939). KEIMBLATTCHIMÄRENFORSCHUNG AN  
758 SEEIGELLARVEN. *Biol. Rev.* **14**, 88–103.
- 759 **von der Hardt, S., Bakkers, J., Inbal, A., Carvalho, L., Solnica-Krezel, L.,**  
760 **Heisenberg, C.-P. and Hammerschmidt, M.** (2007). The Bmp Gradient of the  
761 Zebrafish Gastrula Guides Migrating Lateral Cells by Regulating Cell-Cell  
762 Adhesion. *Curr. Biol.* **17**, 475–487.
- 763 **Waki, K., Imai, K. S. and Satou, Y.** (2015). Genetic pathways for differentiation of  
764 the peripheral nervous system in ascidians. *Nat. Commun.* **6**, 8719.
- 765 **Willot, V., Mathieu, J., Lu, Y., Schmid, B., Sidi, S., Yan, Y. L., Postlethwait, J.**  
766 **H. H., Mullins, M., Rosa, F., Peyri eras, N., et al.** (2002). Cooperative action  
767 of ADMP- and BMP-mediated pathways in regulating cell fates in the zebrafish  
768 gastrula. *Dev. Biol.* **241**, 59–78.
- 769 **Zhou, J., Pal, S., Maiti, S. and Davidson, L. A.** (2015). Force production and  
770 mechanical accommodation during convergent extension. *Development* **142**,  
771 692–701.



A

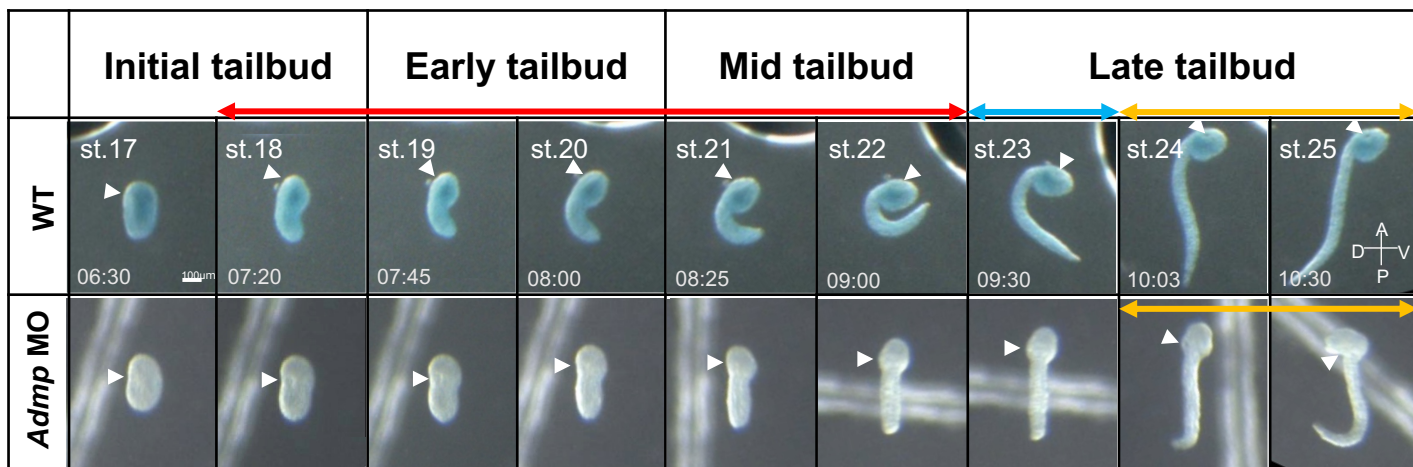

B

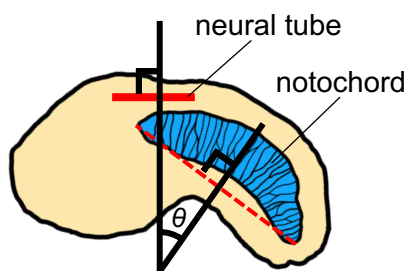

Definition of bending angle

C

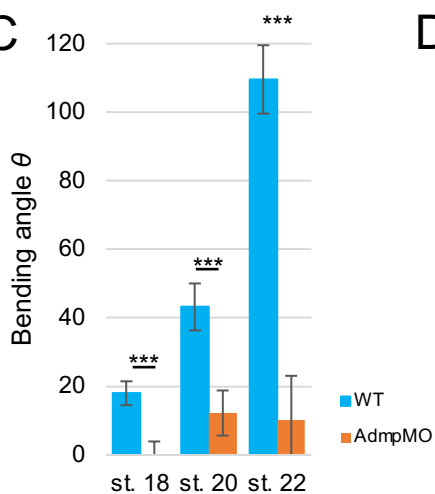

D

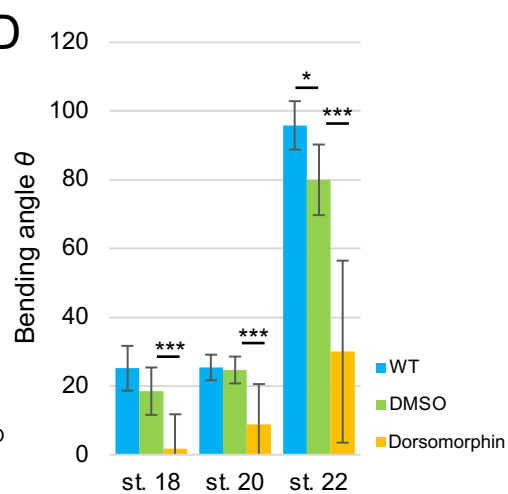

E

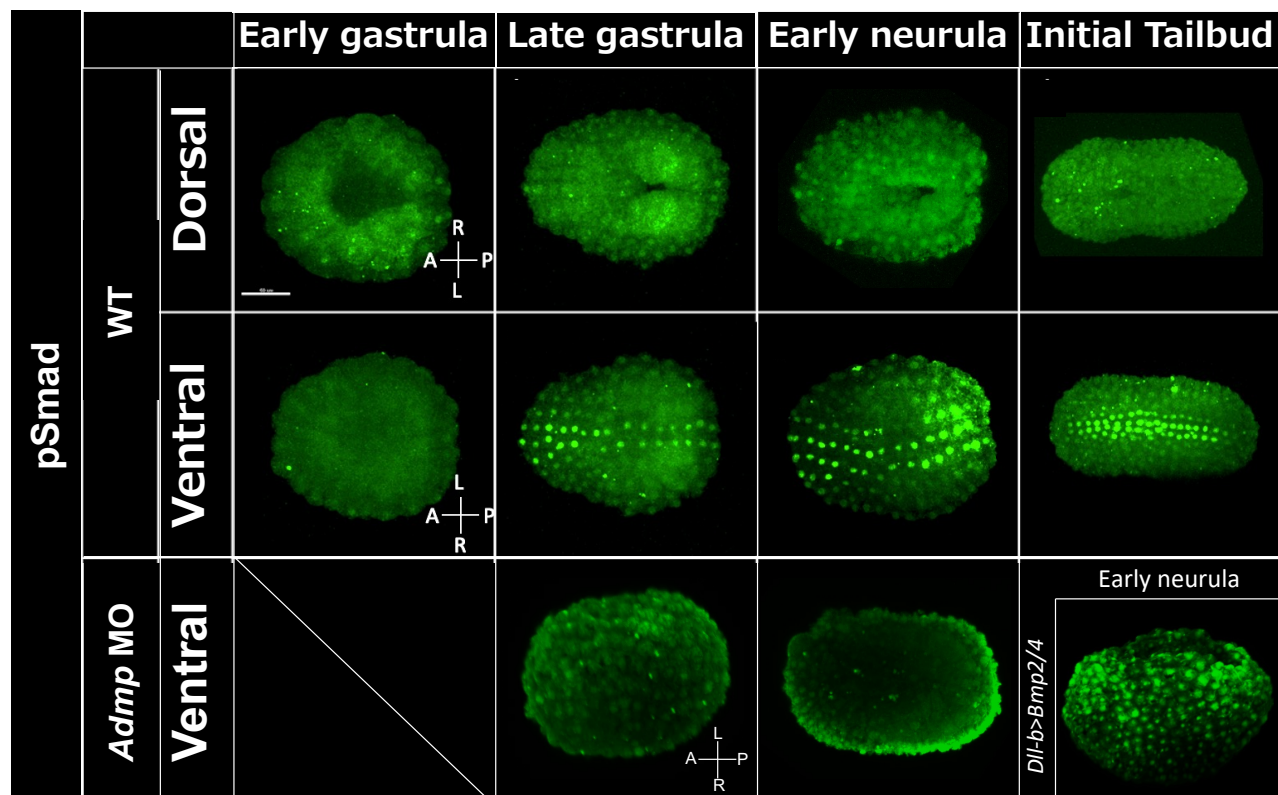

Fig. 1

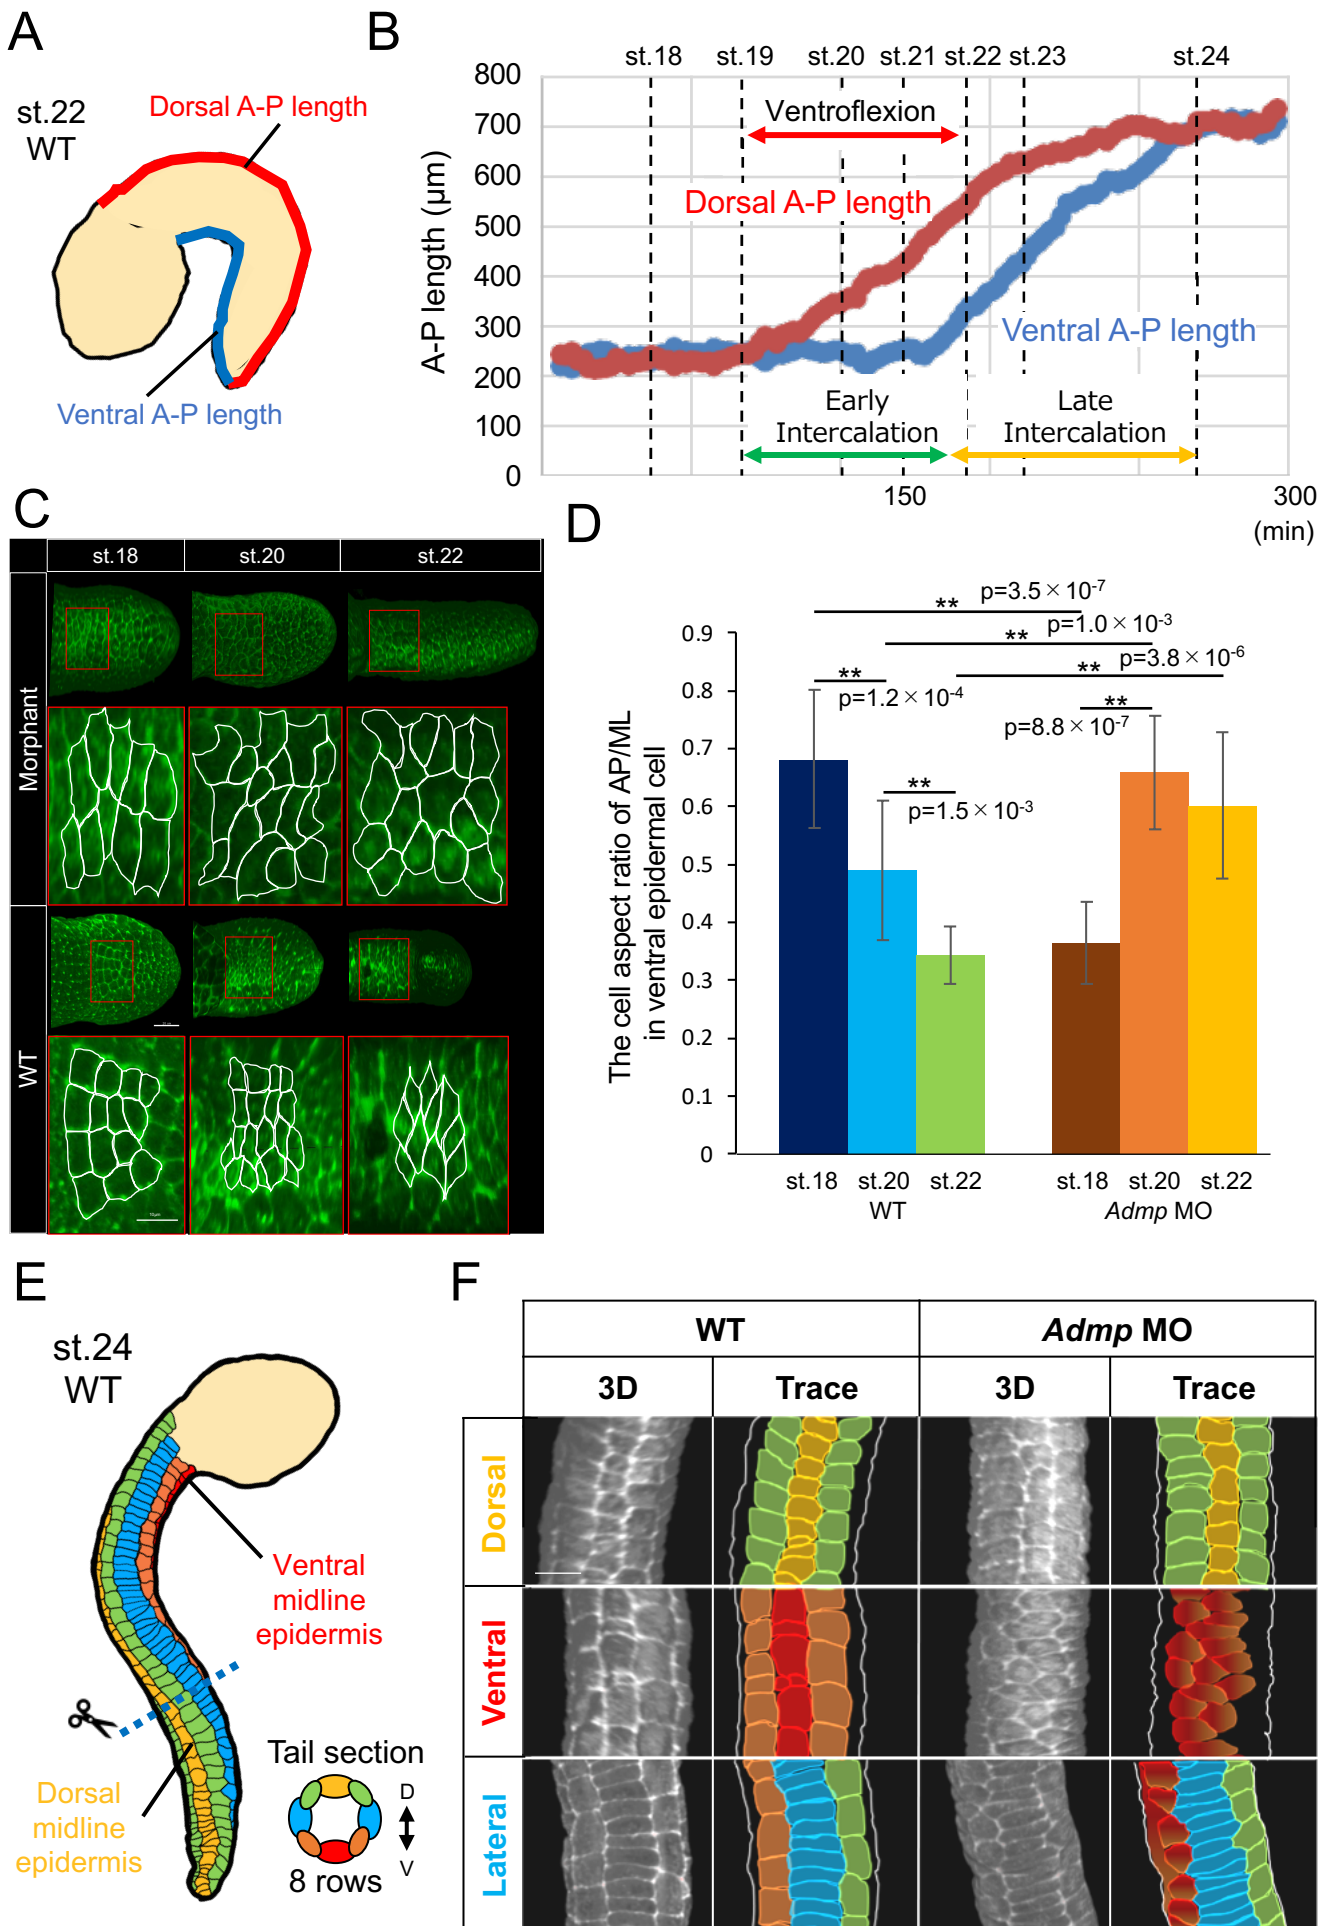

**Fig. 2**

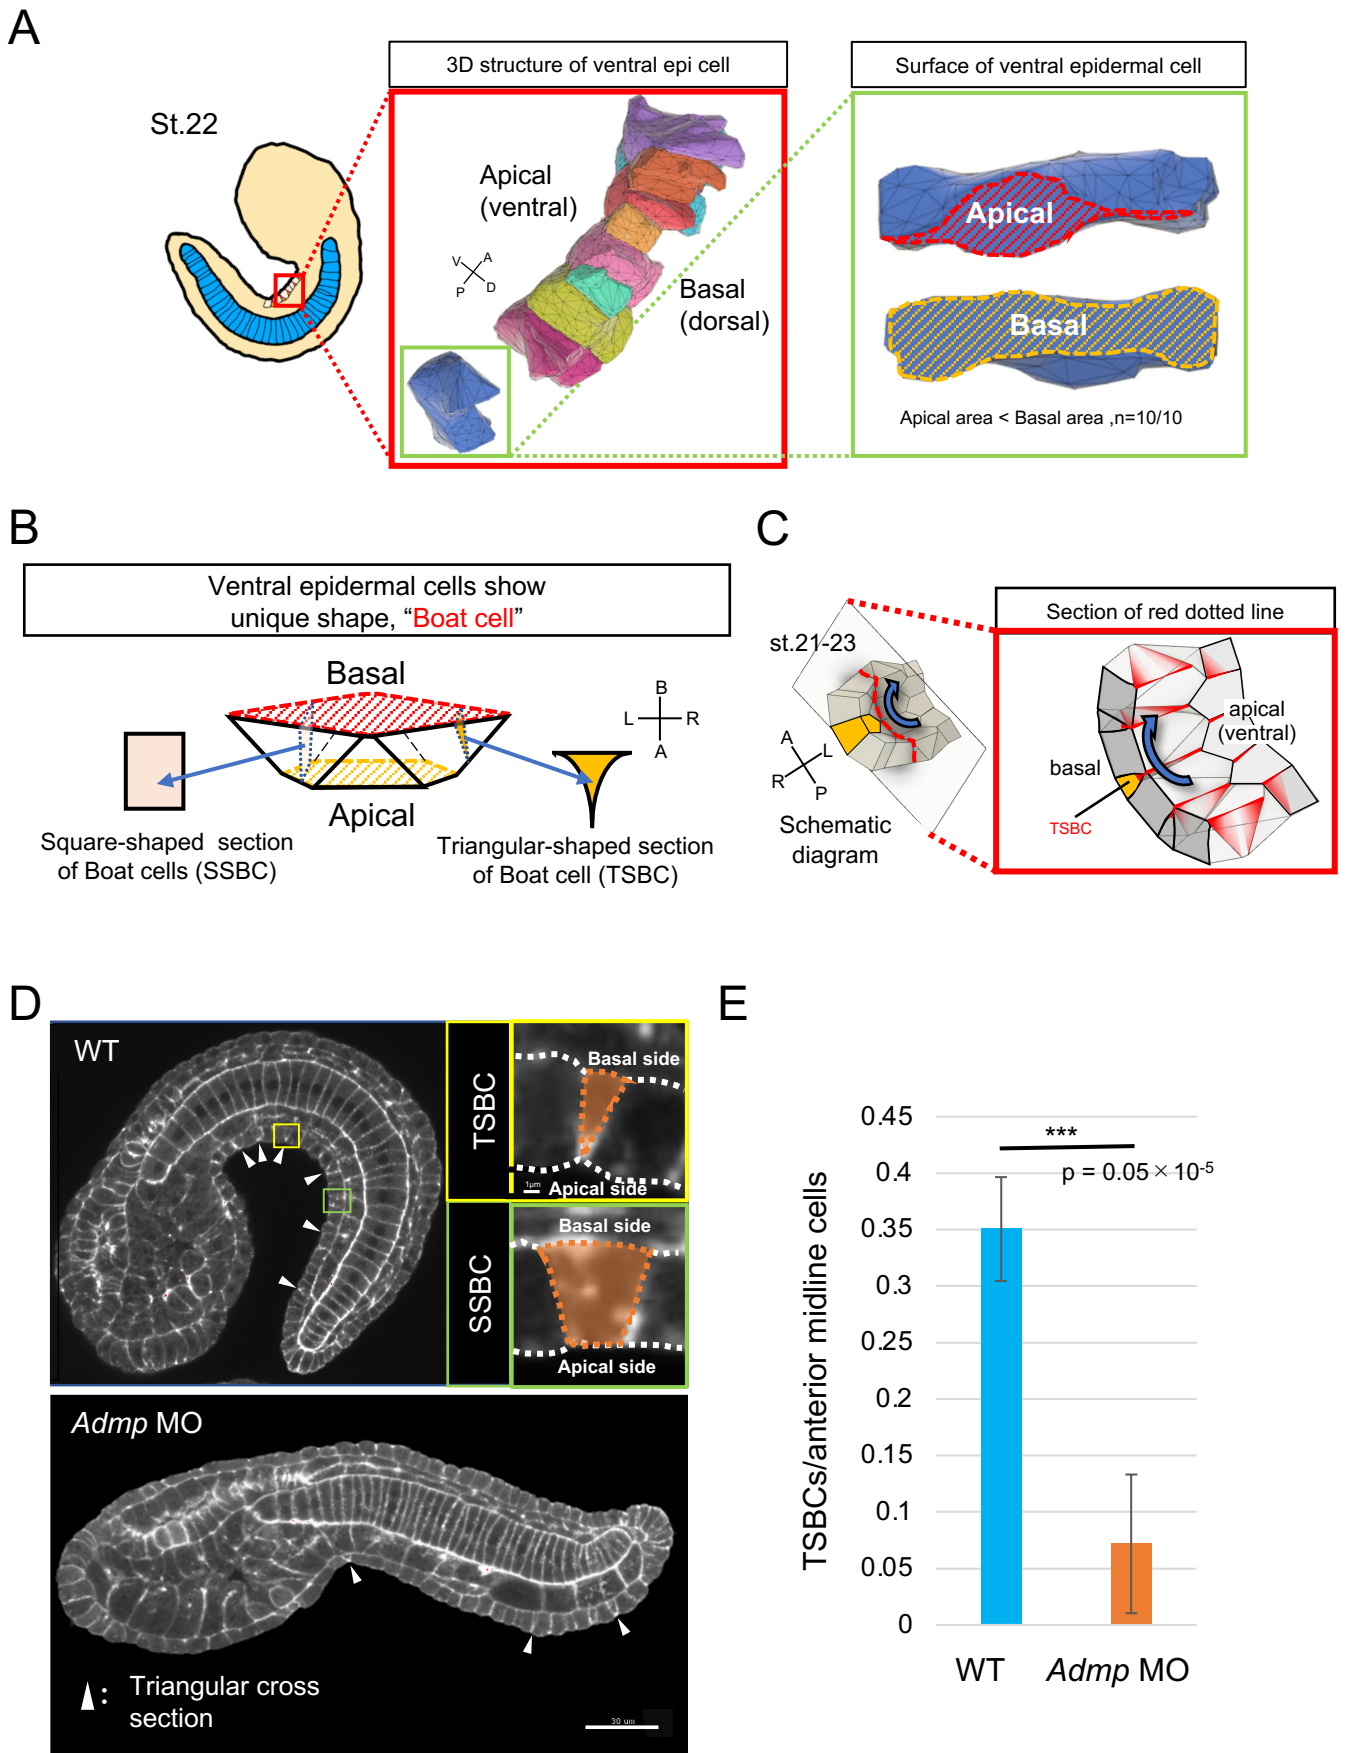

**Fig. 3**

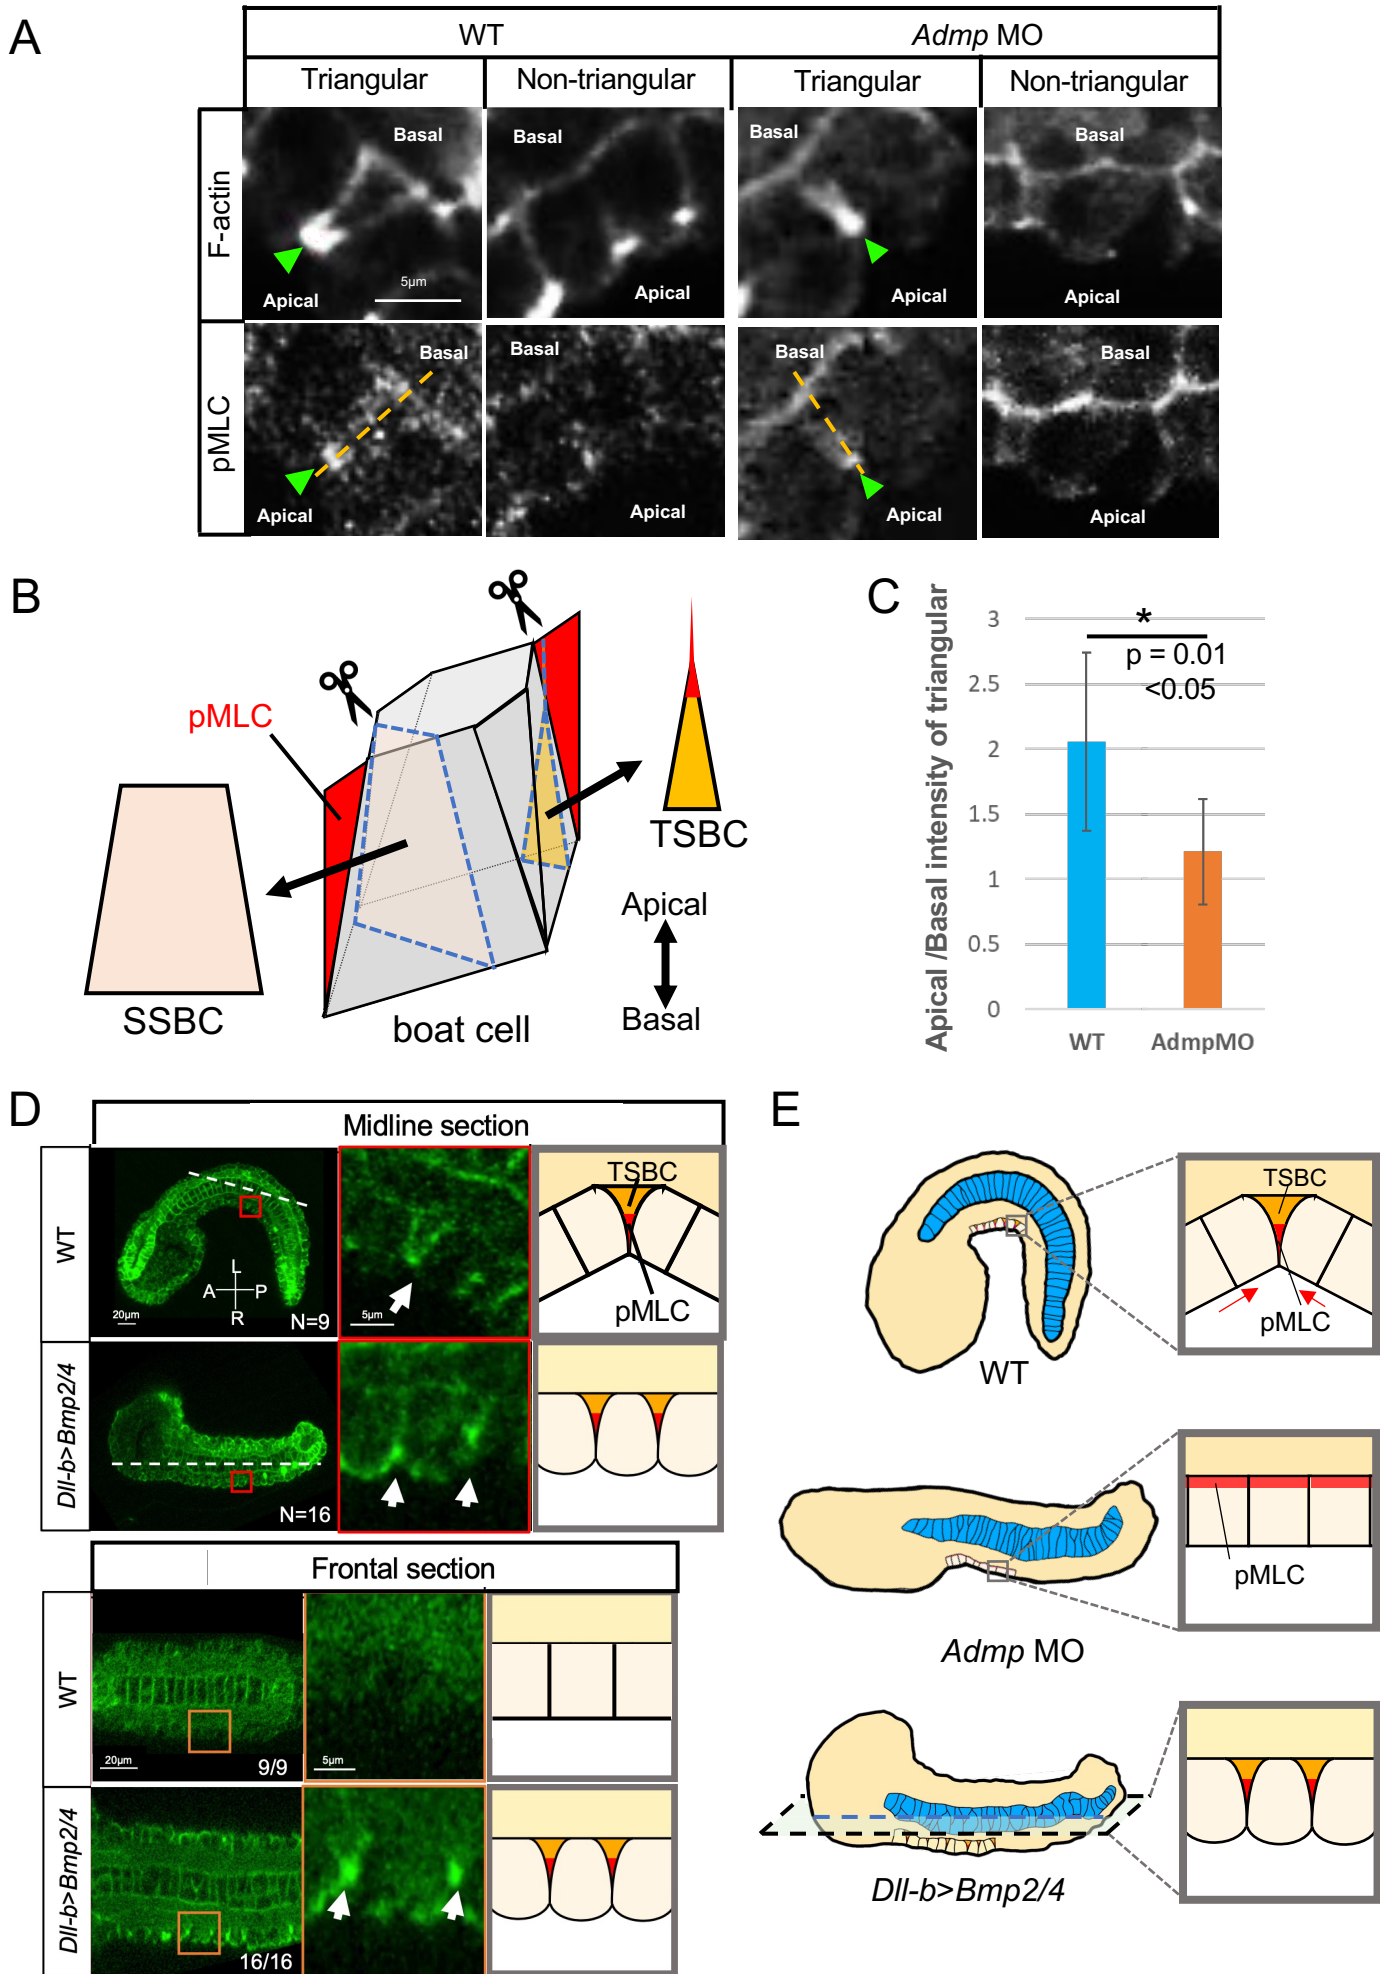

**Fig. 4**



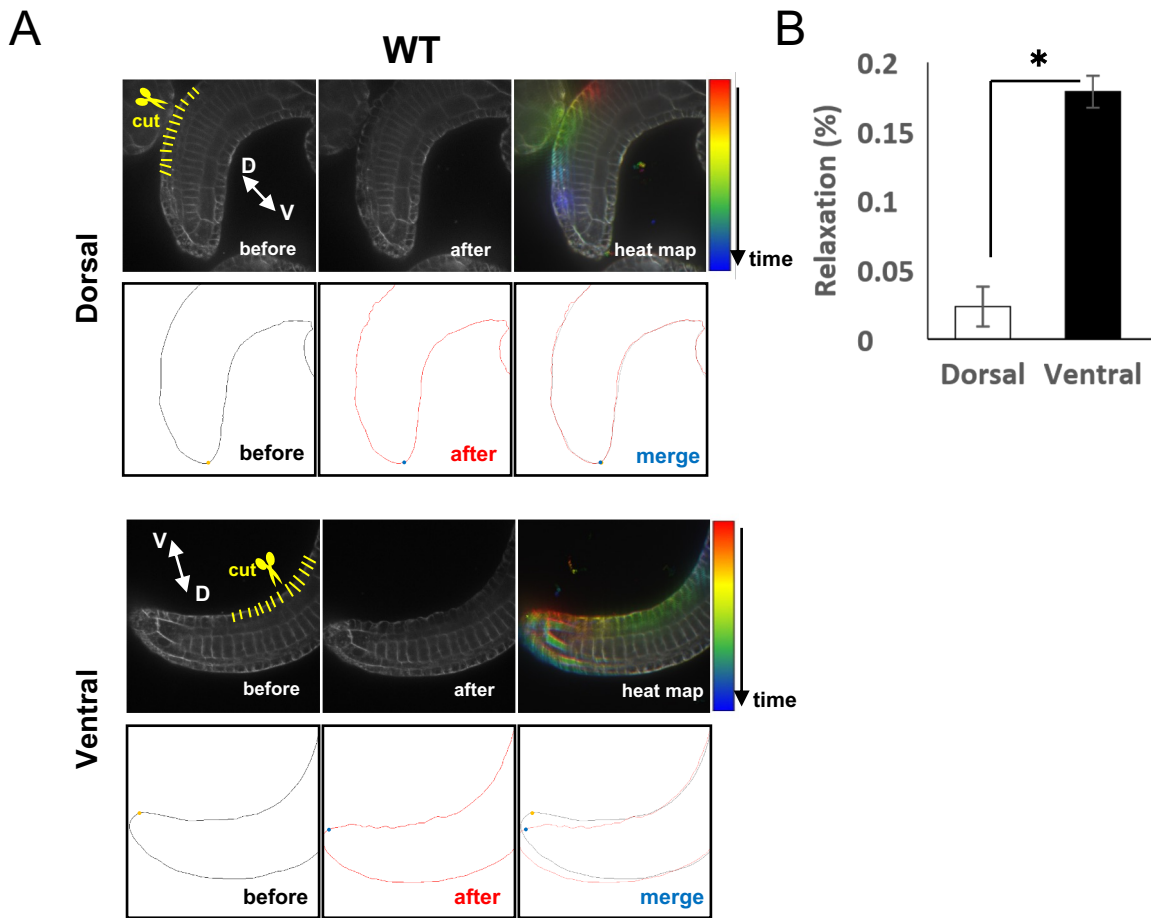

Relaxation (%)



**Fig. 5**

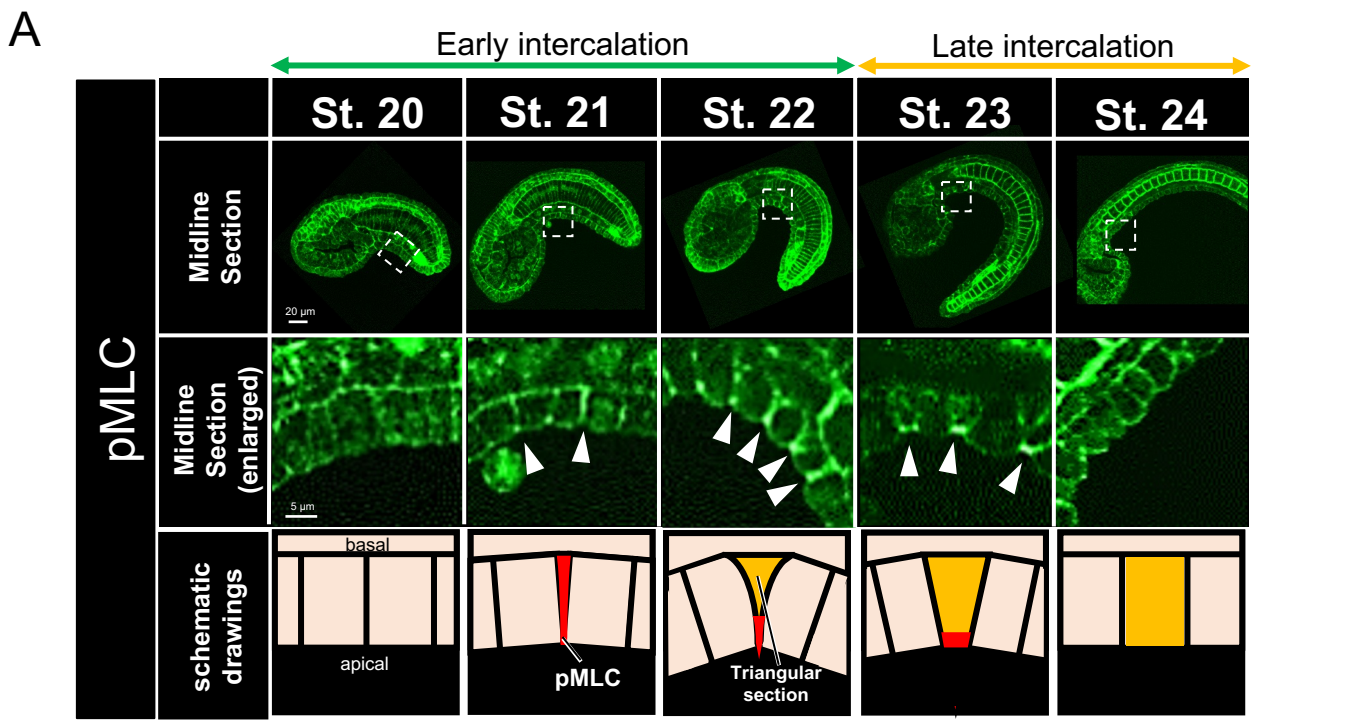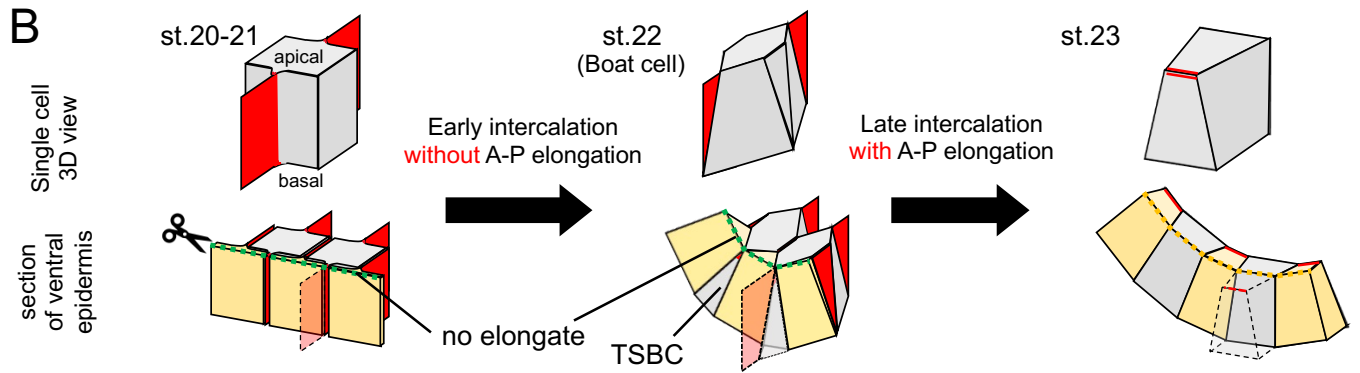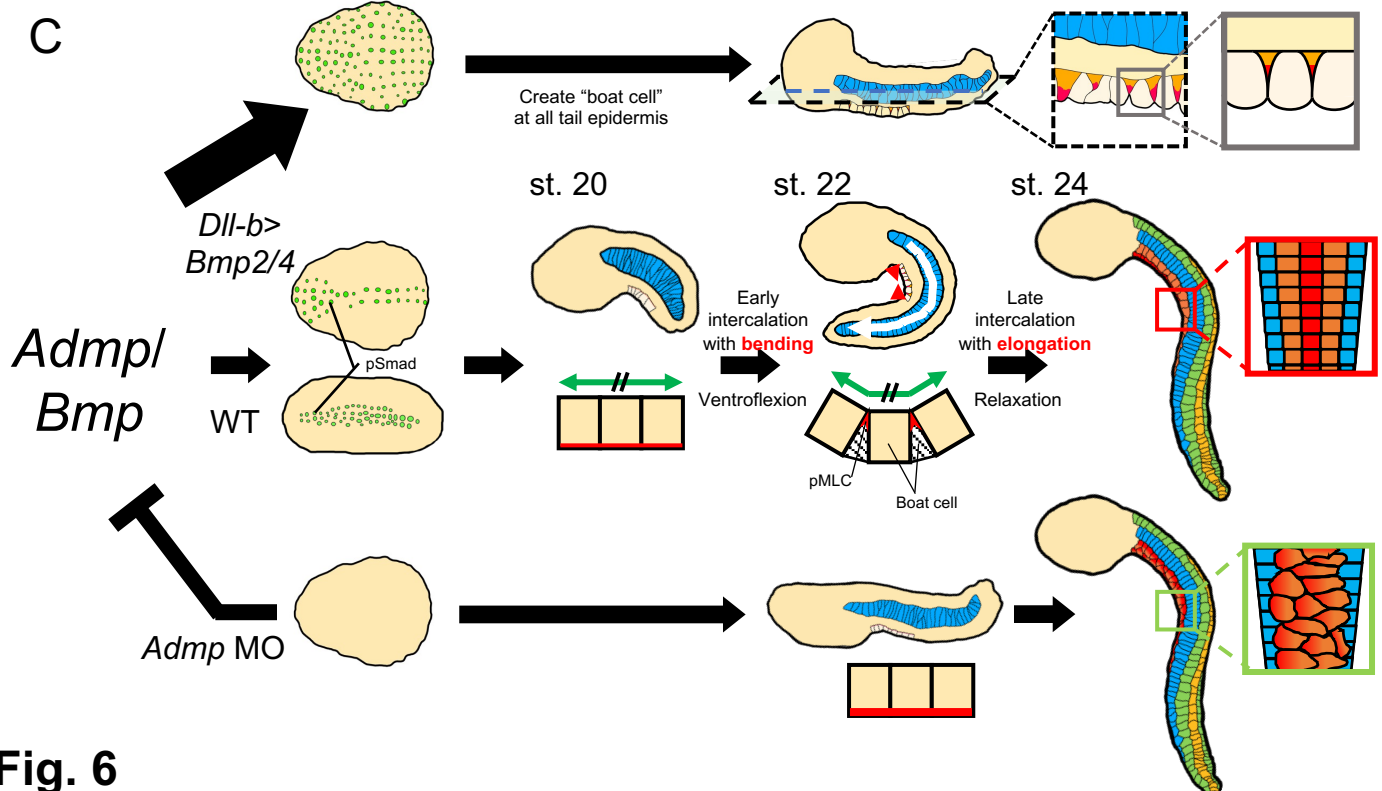

**Fig. 6**
